# Supplementary material for: Isolation and Characterization of A2-EPTX-Nsm1a, a Secretory Phospholipase A2 from Malaysian Spitting Cobra (Naja sumatrana) Venom
Source: MDPI journal article supplement (doi:10.3390/toxins13120859), 2021-12-02
Supplement: s1 [file s1]

## Supplementary data

### Supplementary 1

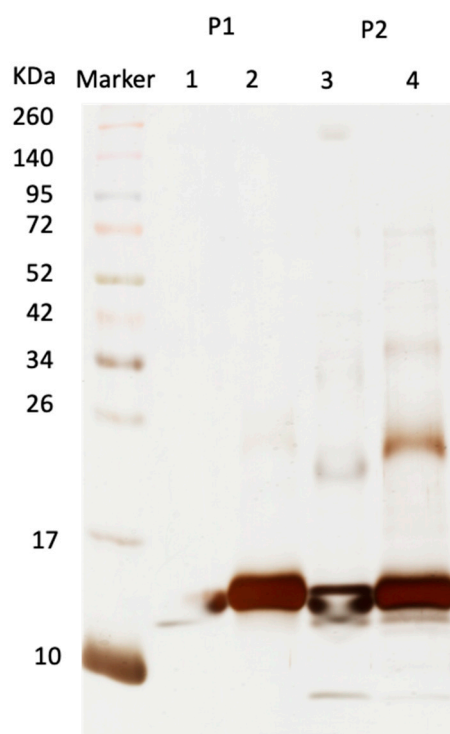

**Supplementary Figure S1:** SDS-PAGE of protein bands from the fraction eluted in the G75 Superdex™ column named P1 and P2 (Figure 1b). Five µg of protein bands in SDS-PAGE gel stained with silver staining. The first fraction eluted from the G75 Superdex™ column named P1 exhibited dominant protein bands in between the molecular weight of 15 to 26 KDalton in both reducing and nonreducing conditions (lanes 1 and 2). The second elution named P2 (lines 3 and 4) showed protein bands at broader size, up to 72 KDa. P2 protein bands revealed two bands at MW 20KDa and 15KDa at nonreducing condition (lane 3), respectively. Meanwhile, protein bands for P2 fractions exhibited four bands with estimated MW were 72KDa, 40KDa, 23KDa and 15KDa. All bands in each fraction (P1 & P2) were cut and digested with trypsin before subjected to ESI-LC-MSMS for its protein identification. All LC-MSMS data obtained in the fractions were pooled and presented in supplementary tables 1a and 1b.

**Supplemental Table S1a:** Protein profile of fraction P1 eluted from G75 Superdex™ column. Protein gel bands were tryptic digested and identified by ESI-LC-MSMS. Most of the proteins detected in P1 protein bands are phospholipase A<sub>2</sub> and venom nerve growth factor from *Naja* species.

| Fraction | Accession | -10lgP | Coverage (%) | #Peptides | #Unique | Avg. Mass | Description                                               | Origin of species       |
|----------|-----------|--------|--------------|-----------|---------|-----------|-----------------------------------------------------------|-------------------------|
| P1       | Q9I900    | 255.4  | 78           | 36        | 5       | 16097     | Acidic phospholipase A <sub>2</sub> D                     | <i>Naja sputatrix</i>   |
|          | P00596    | 231.01 | 79           | 26        | 2       | 16271     | Acidic phospholipase A <sub>2</sub> 1                     | <i>Naja kaouthia</i>    |
|          | Q9I133    | 216.42 | 79           | 20        | 2       | 15949     | Acidic phospholipase A <sub>2</sub> 2                     | <i>Naja atra</i>        |
|          | Q6T179    | 210    | 52           | 23        | 2       | 14198     | Acidic phospholipase A <sub>2</sub> 4 (Fragment)          | <i>Naja sagittifera</i> |
|          | P01140    | 198.37 | 91           | 12        | 1       | 13023     | Venom nerve growth factor                                 | <i>Naja naja</i>        |
|          | P60043    | 188.05 | 48           | 17        | 3       | 14003     | Basic phospholipase A <sub>2</sub> 1 (Fragment)           | <i>Naja sagittifera</i> |
|          | P25498    | 185.72 | 66           | 14        | 3       | 13229     | Acidic phospholipase A <sub>2</sub> E                     | <i>Naja oxiana</i>      |
|          | P60044    | 174.18 | 50           | 15        | 1       | 14073     | Acidic phospholipase A <sub>2</sub> 2 (Fragment)          | <i>Naja sagittifera</i> |
|          | P60045    | 168.88 | 67           | 13        | 2       | 13969     | Acidic phospholipase A <sub>2</sub> 3 (Fragment)          | <i>Naja sagittifera</i> |
|          | Q92084    | 108.77 | 49           | 5         | 5       | 16189     | Neutral phospholipase A <sub>2</sub> muscarinic inhibitor | <i>Naja sputatrix</i>   |

**Supplemental Table S1b:** Protein profile of fraction P2 eluted from G75 Superdex™ column. Protein gel bands were tryptic digested and identified by ESI-LC-MSMS. Protein profile in P2 exhibited the presence of acidic and neutral phospholipase A<sub>2</sub>, venom nerve growth factors and thaicobrin.

| Fraction | Accession | -10lgP | Coverage (%) | #Peptides | #Unique | Avg. Mass | Description                                               | Origin of species       |
|----------|-----------|--------|--------------|-----------|---------|-----------|-----------------------------------------------------------|-------------------------|
| P2       | Q9I133    | 231.54 | 63           | 23        | 1       | 15949     | Acidic phospholipase A <sub>2</sub> 2                     | <i>Naja atra</i>        |
|          | P01140    | 211.23 | 97           | 16        | 2       | 13023     | Venom nerve growth factor                                 | <i>Naja naja</i>        |
|          | P01140    | 200.75 | 95           | 12        | 11      | 13023     | Venom nerve growth factor                                 | <i>Naja naja</i>        |
|          | Q6T179    | 200.22 | 52           | 17        | 1       | 14198     | Acidic phospholipase A <sub>2</sub> 4 (Fragment)          | <i>Naja sagittifera</i> |
|          | A4FS04    | 192.21 | 76           | 13        | 2       | 13188     | Acidic phospholipase A <sub>2</sub> natratxin             | <i>Naja atra</i>        |
|          | P25498    | 187.51 | 66           | 13        | 4       | 13229     | Acidic phospholipase A <sub>2</sub> E                     | <i>Naja oxiana</i>      |
|          | P82885    | 184.38 | 69           | 10        | 5       | 12038     | Thaicobrin                                                | <i>Naja kaouthia</i>    |
|          | P60044    | 180.37 | 60           | 13        | 1       | 14073     | Acidic phospholipase A <sub>2</sub> 2 (Fragment)          | <i>Naja sagittifera</i> |
|          | Q92084    | 154.38 | 68           | 7         | 2       | 16189     | Neutral phospholipase A <sub>2</sub> muscarinic inhibitor | <i>Naja sputatrix</i>   |
|          | P61898    | 149.37 | 94           | 10        | 1       | 13064     | Venom nerve growth factor                                 | <i>Naja atra</i>        |

## Supplementary 2

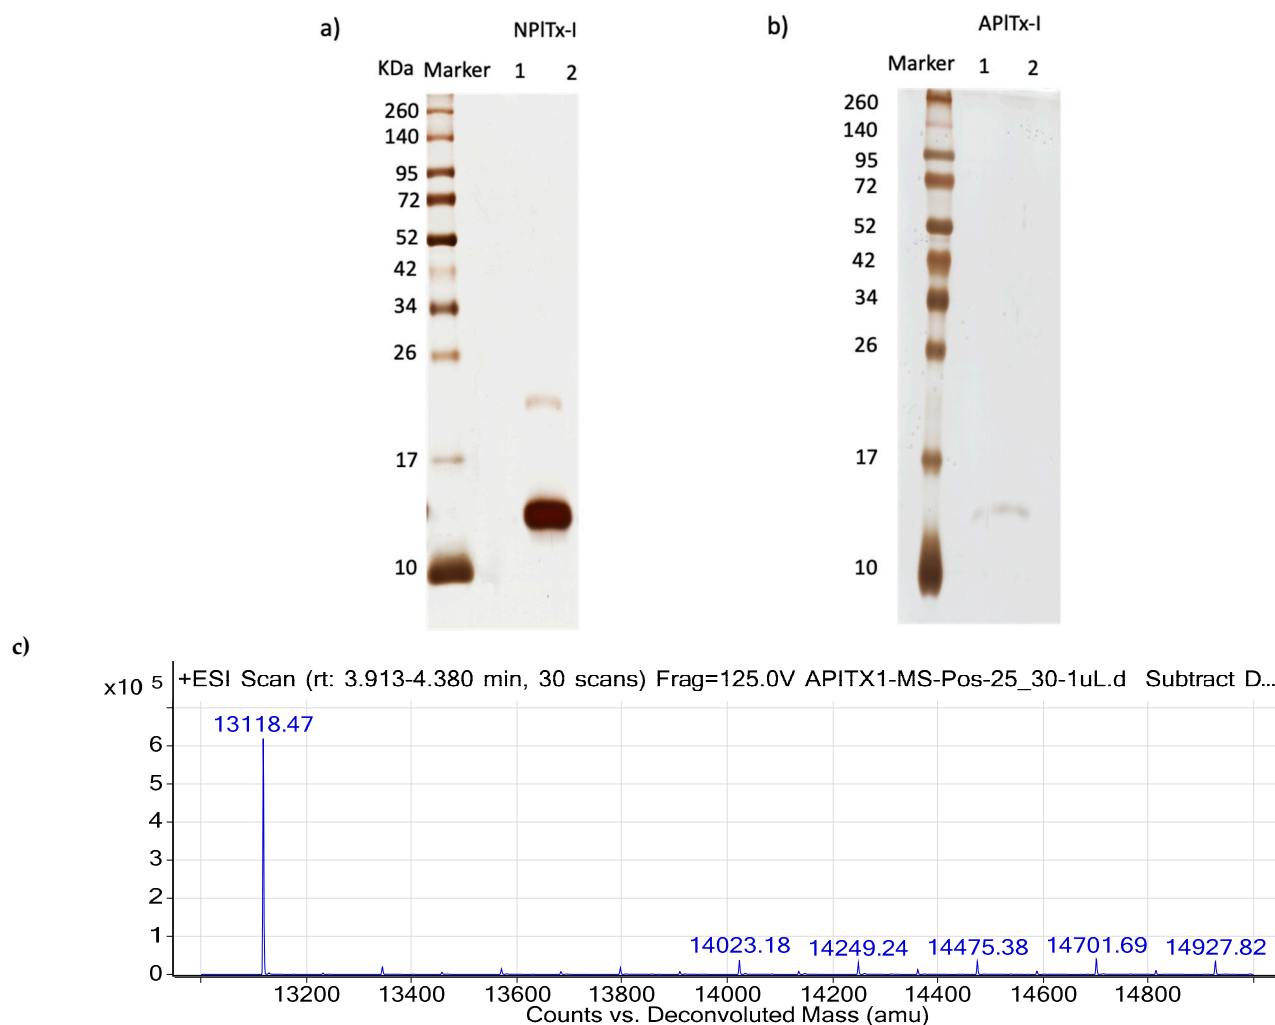

**Supplementary Figure S2:** Protein bands of two fractions collected from the C18 reverse phase column separated in SDS-PAGE gel and stained with silver staining. The first peak eluted from the C18 column named NPITx-I were evaluated in Glycine SDS-PAGE both in nonreducing (lane 1) and reducing (lane 2) (a). NPITx-I showed a dominant band at MW 13KDa and another low express band at 20KDa. The second elution named APITx-I showed low expression of a protein band at a lower migration of 13KDa (b). Intact protein analysis using accurate mass LC-MS showed that APITx-II has a molecular weight of 13,118.47 Da suggested different isomers or consisted of PLA2 fragment due to the mass differences of ~2KDa with A2-EPTX-Nsm1a, which been originated from NPITx-I. All protein bands from NPITx-I and APITx-II were subjected to in-gel tryptic digestion, and protein identification was performed by ESI-LC-MSMS (Supplemental table 2a and 2b).

**Supplemental Table S2a:** Protein profile of fraction NPITx-I eluted from C18 reverse-phase column. Protein gel bands were tryptic digested and identified by ESI-LC-MSMS. Protein profiles of NPITx-I indicated similarity with phospholipase A<sub>2</sub> from *Naja* species.

| Fraction | Accession | -10lgP | Coverage (%) | #Peptides | #Unique | Avg. Mass | Description                                               | Origin of species       |
|----------|-----------|--------|--------------|-----------|---------|-----------|-----------------------------------------------------------|-------------------------|
| NPITx-I  | Q9I900    | 204.12 | 71           | 20        | 1       | 16097     | Acidic phospholipase A <sub>2</sub> D                     | <i>Naja sputatrix</i>   |
|          | P00596    | 192.23 | 80           | 20        | 2       | 16271     | Acidic phospholipase A <sub>2</sub> 1                     | <i>Naja kaouthia</i>    |
|          | Q9I133    | 184.5  | 63           | 14        | 1       | 15949     | Acidic phospholipase A <sub>2</sub> 2                     | <i>Naja atra</i>        |
|          | Q6T179    | 162.87 | 52           | 13        | 1       | 14198     | Acidic phospholipase A <sub>2</sub> 4 (Fragment)          | <i>Naja sagittifera</i> |
|          | P60043    | 149.35 | 38           | 10        | 1       | 14003     | Basic phospholipase A <sub>2</sub> 1 (Fragment)           | <i>Naja sagittifera</i> |
|          | P25498    | 146.69 | 54           | 10        | 2       | 13229     | Acidic phospholipase A <sub>2</sub> E                     | <i>Naja oxiana</i>      |
|          | P60045    | 137.27 | 44           | 9         | 1       | 13969     | Acidic phospholipase A <sub>2</sub> 3 (Fragment)          | <i>Naja sagittifera</i> |
|          | P60044    | 133.62 | 50           | 8         | 1       | 14073     | Acidic phospholipase A <sub>2</sub> 2 (Fragment)          | <i>Naja sagittifera</i> |
|          | P00601    | 127.06 | 47           | 11        | 1       | 13360     | Acidic phospholipase A <sub>2</sub> DE-III                | <i>Naja melanoleuca</i> |
|          | Q92084    | 118.58 | 68           | 8         | 3       | 16189     | Neutral phospholipase A <sub>2</sub> muscarinic inhibitor | <i>Naja sputatrix</i>   |

**Supplemental Table S2b:** Protein profile of fraction APITx-I eluted from C18 reverse-phase column. Protein gel bands were tryptic digested and identified by ESI-LC-MSMS. Protein profiles of APITx-I indicated 49% similarity with neutral phospholipase A<sub>2</sub> originated from *Naja sputatrix*.

| Fraction | Accession | -10lgP | Coverage (%) | #Peptides | #Unique | Avg. Mass | Description                                               | Origin of species     |
|----------|-----------|--------|--------------|-----------|---------|-----------|-----------------------------------------------------------|-----------------------|
| APITx-I  | Q92084    | 95.93  | 49           | 5         | 0       | 16189     | Neutral phospholipase A <sub>2</sub> muscarinic inhibitor | <i>Naja sputatrix</i> |
|          | Q92085    | 95.6   | 49           | 5         | 1       | 16175     | Neutral phospholipase A <sub>2</sub> B                    | <i>Naja sputatrix</i> |

## Supplementary 3

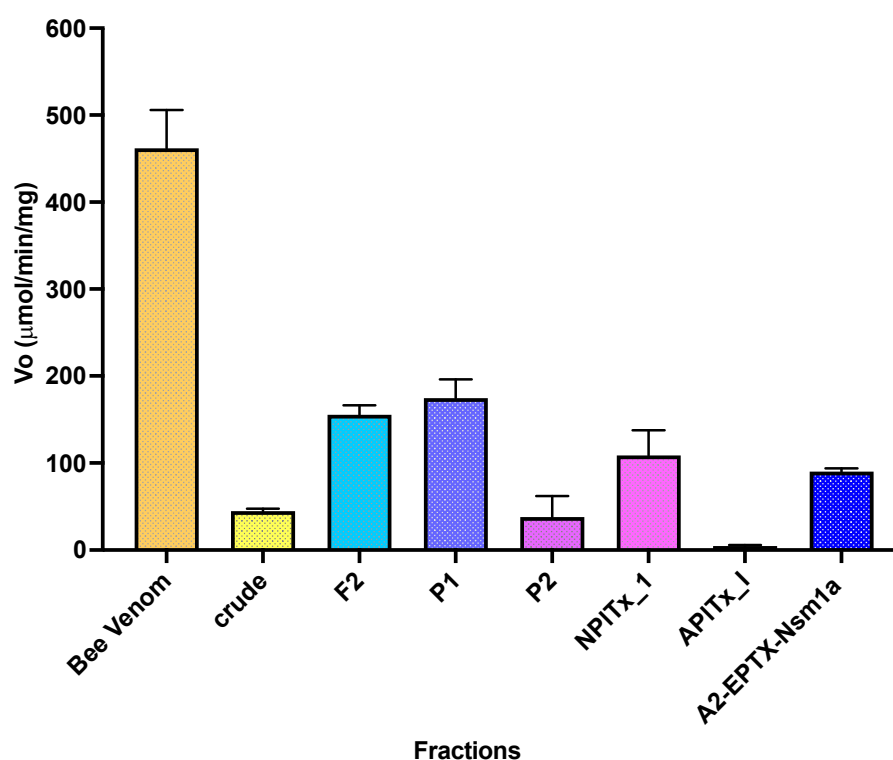

**Supplementary Figure S3:** Confirmation of PLA<sub>2</sub> activity in crude and its fractions that identified with the presence of phospholipase obtained from ESI-LC-MS/MS. A similar amount of each selected fraction and crude *N. sumatrana* venom (0.045 μg/ml) indicated hydrolysis of heptanoyl phosphatidylcholine, indicating the presence of secretory PLA<sub>2</sub>. Fraction 2 (F2) isolated from G50 Sephadex™ column, fraction 1 (P1) eluted from G75 Superdex™ column, and semi-purified PLA<sub>2</sub>, NPITx-I isolated from reverse phase C18 column showed higher secretory PLA<sub>2</sub> activity as compared to fraction P2. This activity suggested due to other toxins such as venom nerve growth factor and thaicobrin (Supplemental table 1b), which probably more dominant in the P2. In addition, the activity of secretory PLA<sub>2</sub> in APITx-I demolished at the same concentration. The assay was performed in triplicate, and bee venom was used as the positive control.
